1  
2  
3  
4  
5  
6  
7  
8  
9  
10  
11  
12  
13  
14  
15  
16  
17  
18  
19  
20  
21  
22  
23  
24  
25  
26  
27  
28  
29  
30  
31  
32  
33  
34  
35  
36  
37

*Title:*

Dynamic properties of internal noise  
probed by modulating binocular rivalry

*Short title:* Internal noise in binocular rivalry

*Authors:* Daniel H. Baker<sup>a</sup> (Orcid ID: 0000-0002-0161-443X)  
Bruno Richard<sup>a,b</sup> (Orcid ID: 0000-0003-4297-2492)

*Author affiliations:*

- a) Department of Psychology, University of York, Heslington, York, United Kingdom, YO10 5DD
- b) Department of Mathematics and Computer Science, Rutgers University – Newark, Newark, New Jersey, USA, 07102

*Corresponding author:* Daniel H Baker, Department of Psychology, University of York, Heslington, York, United Kingdom, YO10 5DD. Email: [daniel.baker@york.ac.uk](mailto:daniel.baker@york.ac.uk)

*Keywords:* binocular rivalry; double pass consistency; internal noise; computational modelling; bistable stimuli.

38  
39  
40  
41  
42  
43  
44  
45  
46  
47  
48  
49  
50  
51  
52  
53  
54  
55  
56  
57  
58  
59  
60  
61  
62  
63  
64  
65  
66  
67  
68  
69  
70  
71  
72  
73  
74

*Abstract*

Neural systems are inherently noisy, and this noise can affect our perception from moment to moment. This is particularly apparent in binocular rivalry, where our perception of competing stimuli shown to the left and right eyes alternates over time in a seemingly random fashion. We investigated internal noise using binocular rivalry by modulating rivalling stimuli using dynamic sequences of external noise of various rates and amplitudes. As well as measuring the effect on dominance durations, we repeated each external noise sequence twice, and assessed the consistency of percepts across repetitions. External noise modulations with standard deviations above 4% contrast increased consistency scores above baseline, and were most effective at 1/8Hz. A computational model of rivalry in which internal noise has a  $1/f$  (pink) temporal amplitude spectrum, and a standard deviation of 16%, provided the best account of our data, and was able to correctly predict perception in additional conditions. Our novel technique provides detailed estimates of the dynamic properties of internal noise during binocular rivalry, and by extension the stochastic processes that drive our perception and other types of spontaneous brain activity.

*Significance statement*

Although our perception of the world appears constant, sensory representations are variable because of the 'noisy' nature of biological neurons. Here we used a binocular rivalry paradigm, in which conflicting images are shown to the two eyes, to probe the properties of this internal variability. Using a novel paradigm in which the contrasts of rivalling stimuli are modulated by two independent external noise streams, we infer the amplitude and character of this internal noise. The temporal amplitude spectrum of the noise has a  $1/f$  spectrum, similar to that of natural visual input, and consistent with the idea that the visual system evolved to match its environment.

## 75 Introduction

76

77 Despite appearing constant, our sensory perception fluctuates from moment to moment  
78 because of the non-deterministic nature of biological neurons. This ‘internal noise’ operates  
79 at multiple timescales, and affects our decisions about sensory information. Internal noise is  
80 particularly apparent in bistable phenomena such as binocular rivalry, in which our perception  
81 of conflicting images shown to the two eyes fluctuates over time in a stochastic fashion.  
82 Because phenomena like rivalry make otherwise invisible processes available to conscious  
83 perception, they provide a useful tool for probing the properties of internal noise.

84

85 In a typical rivalry experiment, participants view sine wave grating patterns with orthogonal  
86 orientations in the left and right eyes (see Figure 1a). They are asked to report which stimulus  
87 they perceive at each moment in time by continuously pressing a response button that  
88 corresponds to the perceived orientation. Histograms of the durations for which each image  
89 remains dominant typically have positive skew, approximating a gamma distribution (or a  
90 normal distribution on logarithmic axes). Computational models of rivalry (e.g. Kim et al.,  
91 2006; Lehky, 1988; Wilson, 2007, 2003) have successfully explained the statistical pattern of  
92 percepts reported by assuming the presence of three key processes: inhibition between  
93 neurons representing the two stimuli, adaptation to the dominant stimulus, and noise.  
94 Inhibitory properties have been investigated using dichoptic masking paradigms (Baker and  
95 Meese, 2007; Legge, 1979; Meese and Baker, 2009) and by varying the properties of rivaling  
96 stimuli (Baker and Graf, 2009a, 2009b; Stuit et al., 2011, 2009), and there is direct evidence  
97 of adaptation during a period of dominance (Alais et al., 2010). However, comparatively little  
98 is known about the precise properties of the noise, as there have been few attempts to  
99 investigate it directly, despite recognition of its importance (Brascamp et al., 2006; Lehky,  
100 1995; Moreno-Bote et al., 2007; Shpiro et al., 2009).

101

102 One exception is a study that randomly manipulated the coherence of rivaling dot motion  
103 stimuli throughout a trial in order to influence alternations (Lankheet, 2006). By reverse-  
104 correlating coherence with the observers’ percepts, a biphasic profile was apparent, in which  
105 coherence was stronger in the suppressed eye and weaker in the dominant eye during the  
106 ~1s preceding a flip. This pattern was reversed at longer pre-flip durations, and overall the  
107 results were predicted by a simple rivalry model featuring adaptation and mutual inhibition.  
108 Although the results demonstrate that external noise can influence rivalry alternations, the  
109 parameters of the external noise were not manipulated, and so the results can reveal little  
110 about the characteristics of internal noise.

111

112 Other work has aimed to influence rivalry alternations by periodically changing the contrast  
113 of the rivaling stimuli. In a study by O’Shea and Crassini (1984), the contrasts of rivaling  
114 gratings were periodically reduced to 0, either in phase or in antiphase across the eyes. At  
115 modulation frequencies above 20Hz (and sometimes as low as 3Hz), rivalry alternations still  
116 occurred as normal regardless of phase, suggesting a persistence in the underlying  
117 mechanism (see also Buckthorpe et al., 2008; Leopold et al., 2002). In a related study, Kim,  
118 Grabowecky and Suzuki (2006) used a square wave temporal modulation to alter the contrast  
119 of rivaling stimuli in antiphase (i.e. one stimulus increased in contrast and the other  
120 decreased at the same time) at a range of temporal frequencies from 0.28Hz to 2.48Hz. This

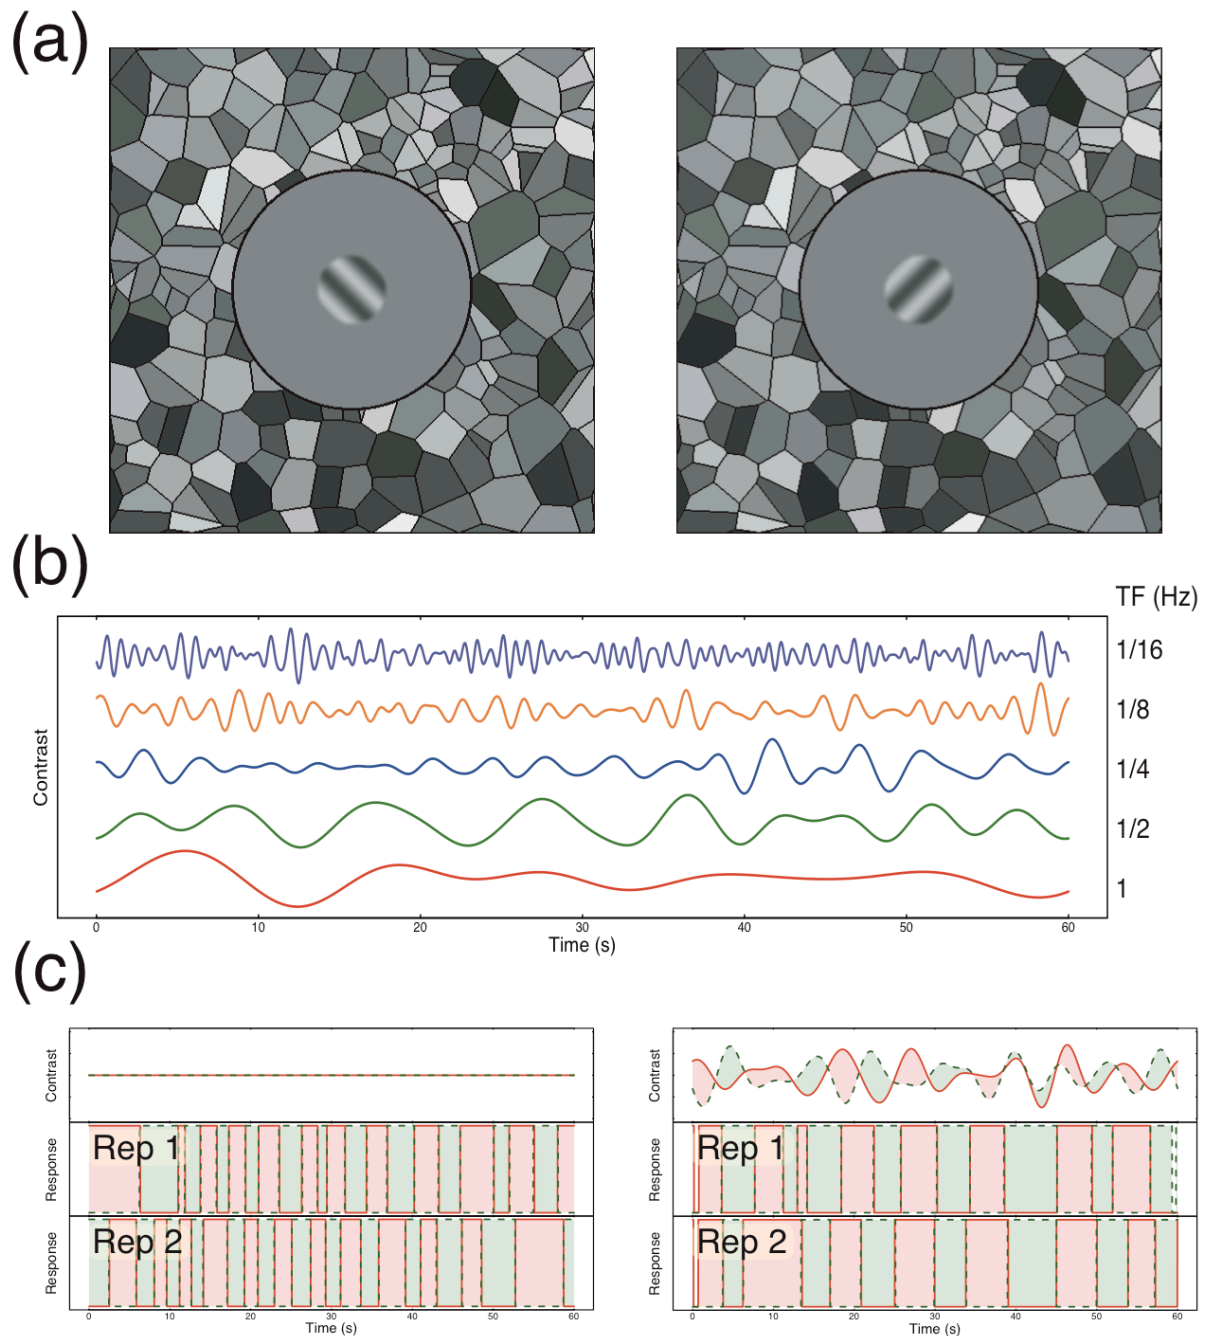

121

122

123

124

125

126

127

128

129

130

131

132

133

134

Figure 1: Methodological details. Panel (a) shows example stimuli with conflicting orientations, surrounded by a Voronoi texture to aid binocular fusion. Panel (b) shows example waveforms used to modulate stimulus contrasts at the five temporal frequencies used in the experiment. Panel (c) shows example trial timecourses for two repetitions of an unmodulated condition (left) and a modulated condition (right). Red (green) regions in the lower two plots indicate periods of time when the left (right) eye's stimulus was perceived. Note that in the example on the right, percepts closely followed the physical contrast with a slight lag.

manipulation caused a peak in the histogram of dominance durations at the half period of the modulation frequency. The increase was greatest when the half period was 600ms, a duration corresponding to the peak of the histogram for unmodulated rivalry using the same stimuli. Furthermore, there were additional peaks at odd integer harmonics of the modulation frequency. The authors consider this to be evidence of a stochastic resonance effect, and support this with a computational model of rivalry alternations.

135 Here we extend these approaches by modulating the contrast of rivalling stimuli using two  
136 independent dynamic noise sequences instead of square wave modulations (see Figure 1b,c).  
137 As well as measuring the effect on dominance durations, this design allows us to reverse  
138 correlate the participant's reported percept with the timecourse of the external noise. In  
139 addition, we can use the same noise sequences multiple times, and measure the consistency  
140 of the participants' percepts in a dynamic version of the 'double pass' paradigm (Burgess and  
141 Colborne, 1988; Green, 1964). If the external noise sequences were entirely determining  
142 perception, responses should be identical across the two repetitions. On the other hand, if  
143 the external noise sequences have no influence on perception then the similarity of responses  
144 will be determined by internal noise, and response consistency will be that expected by  
145 chance. The empirically measured consistency scores will therefore give an index of the  
146 relative influences of internal and external noise on perception. By manipulating the variance  
147 and temporal frequency content of the noise sequences, we can investigate properties of the  
148 internal noise that influences rivalry alternations. We interpret the results with reference to  
149 an established computational model of rivalry proposed by Wilson (2007, 2003) (see Figure  
150 2), to which we add different types of internal noise.  
151

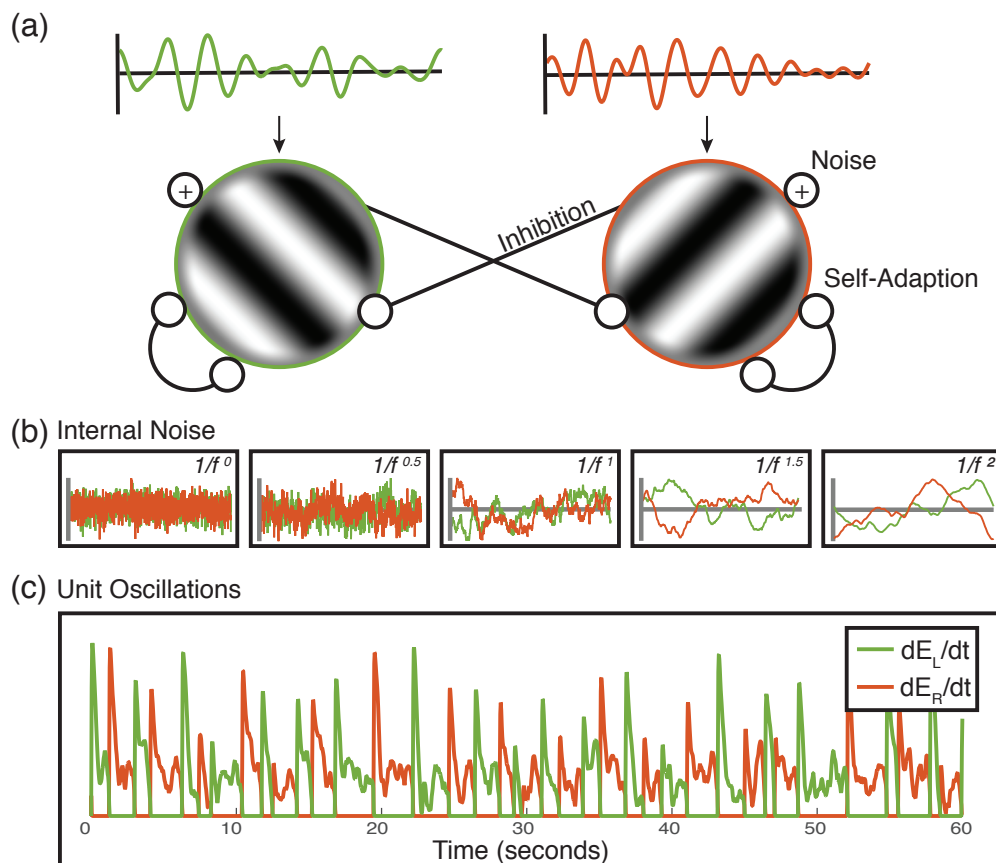

152  
153 Figure 2. Model details. (a) Model diagram of the two competing units. Each receives as input an independent  
154 white noise stream, bandpass filtered at one of five different temporal frequencies (see Methods). The minimum  
155 rivalry model (Wilson, 2007) defines the oscillatory behaviour of rivalry between two units with self-adaptation  
156 and mutual inhibition. We include additive internal independent monocular noise in our model, marked by the  
157 (+) symbol. (b) Examples of the five different internal noise spectral slopes ( $\alpha = 0 - 2.0$ ) of the model for the left  
158 (green) and right (red) responding units. Noise streams with steeper slopes have an increased relative amplitude  
159 of low temporal frequencies relative to high, which leads to slower changes in the noise amplitude. (c) Example  
160 oscillatory behaviour of the model for a given trial (60s). The colours represent the responses of the left (green)  
161 and right (red) responding units.

162 **Results**

163

164 *External noise strongly modulates binocular rivalry alternations*

165

166 In the absence of any noise modulations, binocular rivalry produced a typical histogram of  
 167 dominance durations with a positive skew (see grey curve in Figure 3ai), and a mean of 2.7  
 168 seconds. A 5x5 repeated measures ANOVA indicated that the mean dominance duration  
 169 depended on both temporal frequency ( $F(4,16)=34.43, p<0.001, \eta_p^2=0.90$ ) and modulation  
 170 contrast ( $F(4,16)=8.15, p<0.01, \eta_p^2=0.67$ ), and also showed that the two variables interacted  
 171 ( $F(16,64)=18.01, p<0.001, \eta_p^2=0.82$ ). The histograms in Figure 3a show that at lower temporal  
 172 frequencies, strong contrast modulation resulted in slightly more long-duration percepts (an  
 173 increase in positive skew), whereas at higher temporal frequencies the peak of the histogram  
 174 shifted leftwards. These patterns were reflected in both the change in means (Figure 3b) and  
 175 also the shift in the autocorrelation functions (Figure 3c), such that high temporal frequencies  
 176 (e.g. the purple curve) had a shorter lag than long ones (e.g. the red curve). The functions in  
 177 Figure 3b begin to diverge at a contrast of around 4%, and data from individual participants  
 178 showed a similar pattern (see Supplementary Figure S1).

179

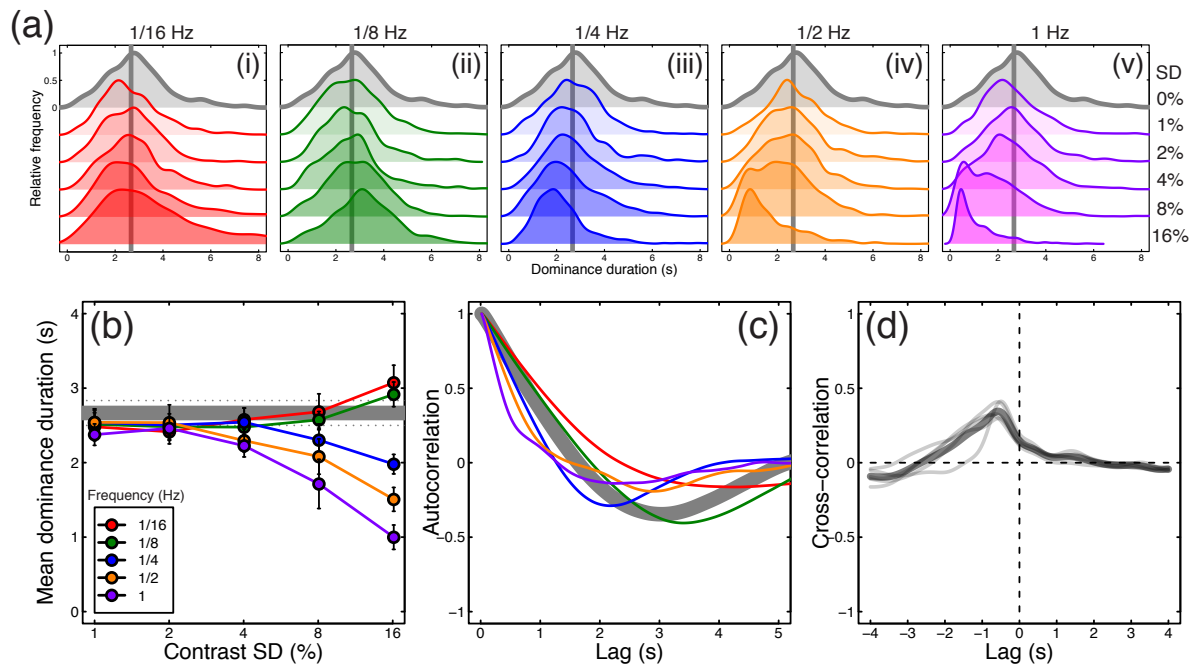

180

181 Figure 3: Traditional rivalry measures for all conditions, averaged (or pooled) across all participants (N=5). Panel  
 182 (a) shows histograms of pooled dominance durations at five temporal frequencies (i-v) and a range of contrast  
 183 levels (standard deviations of 0 – 16%, increasing down each plot). The grey histogram, duplicated in each plot,  
 184 shows the baseline condition with no contrast modulation. For low temporal frequency, high contrast  
 185 modulations, there were more very long dominance periods (the positive skew of the red histogram increases).  
 186 For high temporal frequency, high contrast modulations there were more short dominance periods, and the  
 187 histograms shifted left. Panel (b) shows mean dominance durations for all conditions, plotted as a function of  
 188 modulation contrast. The grey horizontal line shows the baseline (no modulation) condition. Error bars (and  
 189 dotted lines) show  $\pm 1SE$  across participants. Panel (c) shows autocorrelation functions averaged across  
 190 participants for the baseline condition (grey curve) and the highest contrast modulation at each temporal  
 191 frequency (curves, see panels a,b for colour legends). Panel (d) shows the cross correlation between the  
 192 difference in noise modulations at the highest modulation contrast, averaged across all modulation frequencies.  
 193 The thin grey lines denote individual participants and the thick black line is the average.

194

195 We also cross-correlated the noise time course (difference between left and right eye  
196 contrasts for the 16% contrast modulation conditions pooled across all temporal frequencies)  
197 with the participants' responses (Figure 3d). This revealed a mean response lag of 583ms,  
198 somewhat faster than estimates from previous studies (Baker and Graf, 2009a). The mean  
199 cross-correlation coefficient at this time point was 0.35, indicating that a substantial  
200 proportion of the variance in participant percepts was predictable from the changes in  
201 stimulus contrast. Functions for individual participants are shown by the thin traces in Figure  
202 3d, and are similar to the mean. Note that the auto- and cross-correlation functions shown  
203 here differ from the switch-triggered-average reverse correlation measure reported by  
204 Lankheet (2006), and the serial correlation measures used by Lehky (1995), van Ee (2009) and  
205 others (where 'lag' on the x-axis refers to dominance epoch rather than time). These  
206 measures assess different aspects of rivalry data that are not the focus of the current work.

207  
208 Next, we calculated the consistency of responses across pairs of presentations of identical  
209 noise streams. In the absence of any noise modulation, the mean consistency was slightly  
210 above the expected baseline of 0.5, having a value of 0.53 (horizontal grey lines in Figure 4).  
211 The most likely explanation for this is that slight eye dominances or biases towards one or  
212 other stimulus will increase the consistency across repetitions, however the effect is very  
213 small. For conditions where the stimulus contrast was modulated, a 5x5 repeated measures  
214 ANOVA indicated that the response consistency depended on both temporal frequency  
215 ( $F(4,16)=9.90$ ,  $p<0.001$ ,  $\eta_p^2=0.71$ ) and modulation contrast ( $F(4,16)=28.81$ ,  $p<0.001$ ,  
216  $\eta_p^2=0.88$ ), as well as the interaction between the two variables ( $F(16,64)=3.55$ ,  $p<0.001$ ,  
217  $\eta_p^2=0.47$ ). These effects are shown in Figure 4, which plots the same data twice as a function  
218 of either modulation contrast (Fig 4a) or temporal frequency (Fig 4b). The general trends are  
219 that consistency increases with contrast, and at each contrast is strongest for the 1/8Hz  
220 temporal frequency (shown in green). The maximum consistency was 0.72, for the 1/8Hz, 16%  
221 contrast condition, which is particularly noteworthy given that this temporal frequency had  
222 the weakest influence on dominance durations (see green points in Figure 3b). Consistency  
223 exceeded baseline for the 1/8Hz condition at around 4% modulation contrast (green  
224 diamonds in Figure 4). These main findings were also clear in the data of individual  
225 participants, shown in Supplementary Figure S1.

226

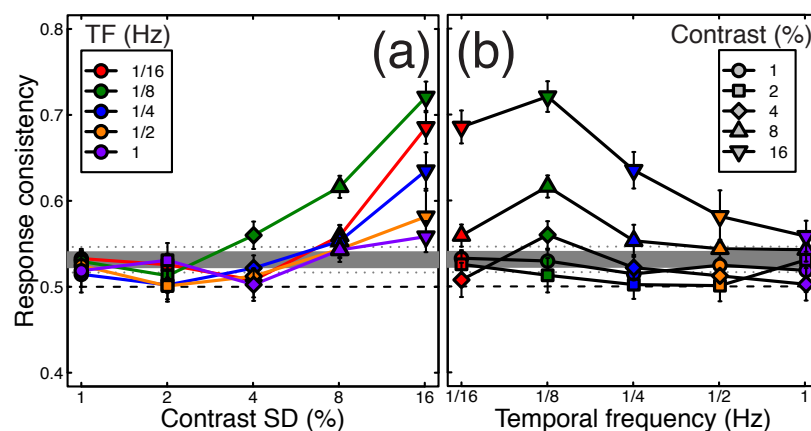

227  
228 Figure 4: Response consistency across two passes through the experiment. The same data are plotted in both  
229 panels, as a function of modulation contrast (a) or temporal frequency (b). In each panel, the thick grey line  
230 represents the baseline (no modulation) condition, colours represent different temporal frequencies, and  
231 symbol types represent different contrasts. All data points are averaged across participants, with error bars

232 indicating  $\pm 1$ SE of the mean. The dashed horizontal line at  $y=0.5$  indicates a theoretical baseline in the absence  
 233 of any response bias or eye dominance effects.

234

235 *A computational model with pink internal noise describes the human results*

236

237 We first investigated how the amplitude of internal noise, and its spectral slope ( $\alpha$ ), affected  
 238 model behaviour. We selected a single stimulus condition (stimulus noise frequency of 1/8Hz  
 239 and amplitude of 16%) and ran the model with a range of internal noise contrast levels (SD =  
 240 1 – 64%) at five different spectral slopes ( $\alpha = 0 - 2$ ). The results of our simulations on  
 241 dominance duration and response consistency are shown in Figure 5a(i-v), with the  
 242 equivalent human data plotted in green for comparison. For all spectral slopes, as internal  
 243 noise contrast increased it more strongly affected rivalry alternations. This is shown by the  
 244 change in dominance duration (Figure 5b; increases for steep slopes and decreases for  
 245 shallow slopes), and response consistency (Figure 5c), which decreased as responses became  
 246 increasingly dominated by internal noise.

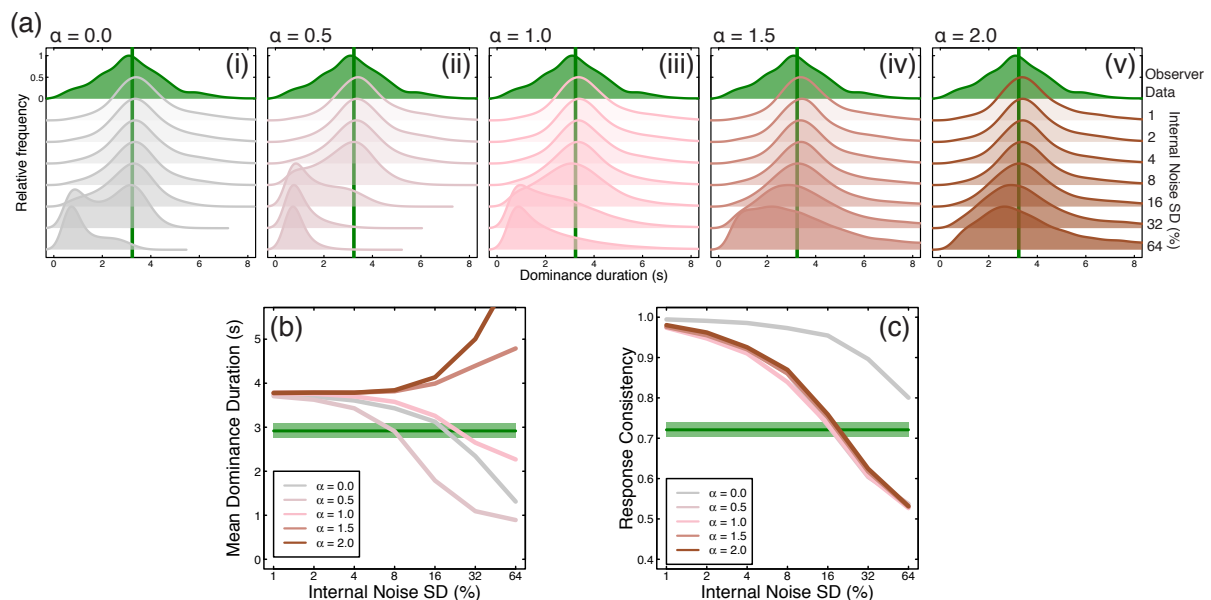

247

248 Figure 5: Summary of model behaviour for internal noise amplitude and spectral slope estimation. (a) The  
 249 histograms of dominance durations for each spectral slope ( $\alpha = 0.0 - 2.0$ ) and contrast (SD = 1% – 64%) values.  
 250 Within each subplot, the uppermost (green shaded) histogram shows the equivalent human data for a stimulus  
 251 temporal frequency of 1/8Hz and a contrast modulation of SD = 16%. The solid vertical green line marks the  
 252 average dominance duration for human observers. Histograms below show model dominance duration  
 253 distributions for each internal noise contrast value. (b) Average dominance durations of the model for each  
 254 spectral slope (coloured lines). The green line and shaded area mark human average dominance duration and  
 255  $\pm 1$ SE of the mean, respectively. Average dominance duration was affected by internal noise once its contrast  
 256 reached 4%. Noise with steeper slopes ( $\alpha = 1.5-2.0$ ) increased mean dominance duration as a function of noise  
 257 contrast, while noise with shallower slopes decreased mean dominance duration. (c) Response consistency  
 258 decreased as a function of internal noise contrast for all spectral slopes. The green line and shaded area mark  
 259 human observer average consistency and  $\pm 1$ SE of the mean, respectively. For all  $\alpha > 0$ , response consistency  
 260 reached human levels at an internal noise contrast of 16%.

261

262 We can use the joint dominance durations and consistency scores to rule out several types of  
 263 internal noise. White internal noise ( $\alpha = 0$ ) is not viable because there is no internal noise level  
 264 for which both durations and consistency are close to human levels. Internal noise with steep  
 265 amplitude slopes ( $\alpha > 1$ ) produces sensible consistency scores, but dominance durations  
 266 become too long. This leaves slopes of  $\alpha = 0.5$  and  $\alpha = 1$ , for which an internal noise contrast



267 of around 16% gives a good approximation to the human data. We performed full simulations  
 268 for all noise spectral slopes with this contrast. A slope of  $\alpha = 1$  was the best predictor of the  
 269 human data, so these simulations are discussed in the main text, with simulations of other  
 270 spectral slopes presented in Supplementary Figures S2 and S3.

271

272 The histograms of dominance durations, mean dominance duration and response consistency  
 273 of the model simulations for all 26 stimulus conditions are shown in Figure 6. The model  
 274 replicated the pattern of human data shown in Figures 3 & 4 remarkably well. The histograms  
 275 of dominance durations of the model (Figure 6a i-v) show similar trends to those of human  
 276 observers (Figure 3a). Slow modulation frequencies (1/16Hz and 1/8Hz) increased positive  
 277 skew at high modulation contrasts (Figure 6a i-ii), while higher modulation frequencies shifted  
 278 the peak of the dominance duration histograms leftwards as modulation contrast increased.  
 279 The shifts in the histograms are reflected in the mean dominance durations of the model  
 280 (Figure 6b), just as with human observers. Similarly, response consistency (Figure 6c, d)  
 281 increased when stimulus noise contrast reached 4% and was highest for each contrast at a  
 282 temporal frequency of 1/8Hz. Whereas human response consistency was quite bandpass  
 283 (peaking at 1/8Hz and dropping quickly for faster frequencies), the model exhibited slightly  
 284 broader tuning at high stimulus noise contrast. This may be due to the other parameters of  
 285 the model that were fixed prior to our simulations, or it could imply additional physiological  
 286 constraints such as bandpass temporal filters on the input, or variable response lag.

287

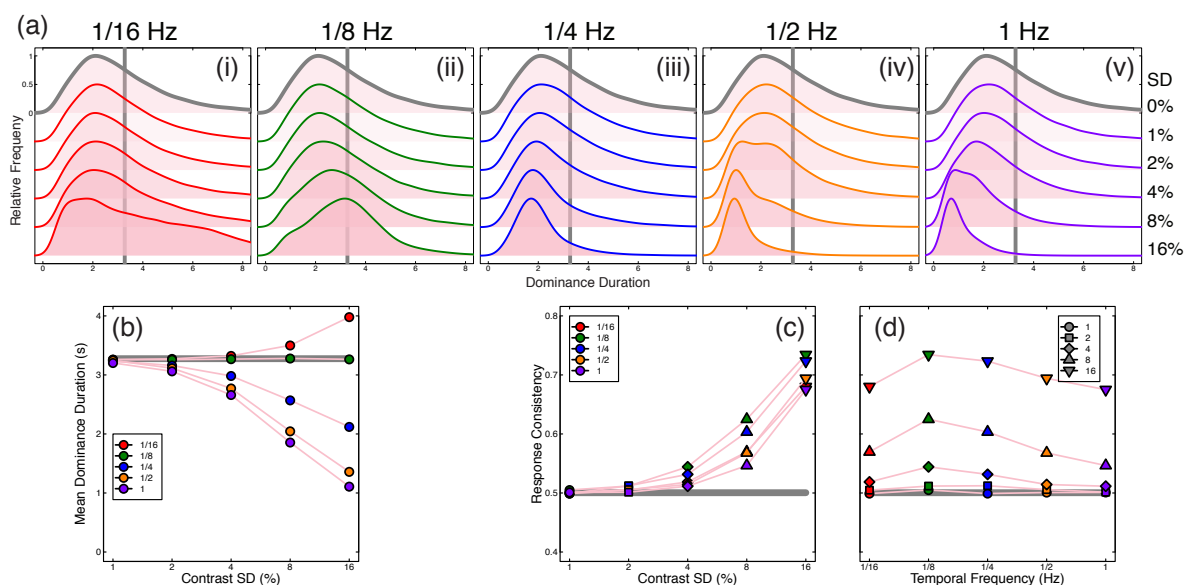

288

289 Figure 6: Summary of modelling results. (a) Histograms of dominance durations of the model with pink ( $\alpha = 1$ )  
 290 internal noise of 16% contrast for each stimulus temporal frequency (i-v) and contrast SD. The solid line colour  
 291 serves as a legend for the stimulus noise temporal frequency (red = 1/16Hz, green = 1/8Hz, blue = 1/4Hz, yellow  
 292 = 1/2Hz, purple = 1Hz). The histogram marked in grey represents baseline dominance durations with no contrast  
 293 modulation. (b) The mean dominance durations of the histograms in (a). Marker colour represents the  
 294 modulation temporal frequency, while the x-axis gives the modulation contrast. The grey line marks the baseline  
 295 dominance duration of the model (3.18s), slightly slower than that of the human data. (c-d) Model response  
 296 consistency plotted in the same manner as Figure 4. In (c), marker colour indicates the modulation temporal  
 297 frequency while the x-axis indicates the modulation contrast. For all stimulus frequencies, response consistency  
 298 increased according to modulation contrast, and was greatest when the stimulus temporal frequency was 1/8Hz.  
 299 (d) Identical data but plotted with modulation temporal frequency on the x-axis. The grey line (c,d) marks  
 300 response consistency at baseline with no external noise fed to the model (0.49).

301

302 *The model predicts consistency with antiphase noise sequences*

303

304 We next explored whether the model could predict performance in novel conditions. Inspired  
 305 by Kim et al. (2006), we designed a further condition in which the noise modulations were in  
 306 antiphase across the eyes (i.e. a contrast increase in one eye matched with an equal contrast  
 307 decrease in the other). We chose a temporal frequency of 1/8Hz, and tested four of our  
 308 original participants. With no free parameters, the model described above made a clear  
 309 quantitative prediction about performance in this condition (see Figure 7a), namely that  
 310 response consistency should be reliably increased for the antiphase noise (brown squares in  
 311 Figure 7a), compared to the equivalent condition from the main experiment with two  
 312 independent streams of external noise (green circles in Figure 7a). This prediction was borne  
 313 out empirically, as shown in Figure 7b. We note that dominance duration histograms from  
 314 our human participants (and therefore mean dominance durations) remained relatively  
 315 unaffected by this manipulation (see Figure 7c), consistent with performance with  
 316 independent noise streams (Figure 3aii).

317

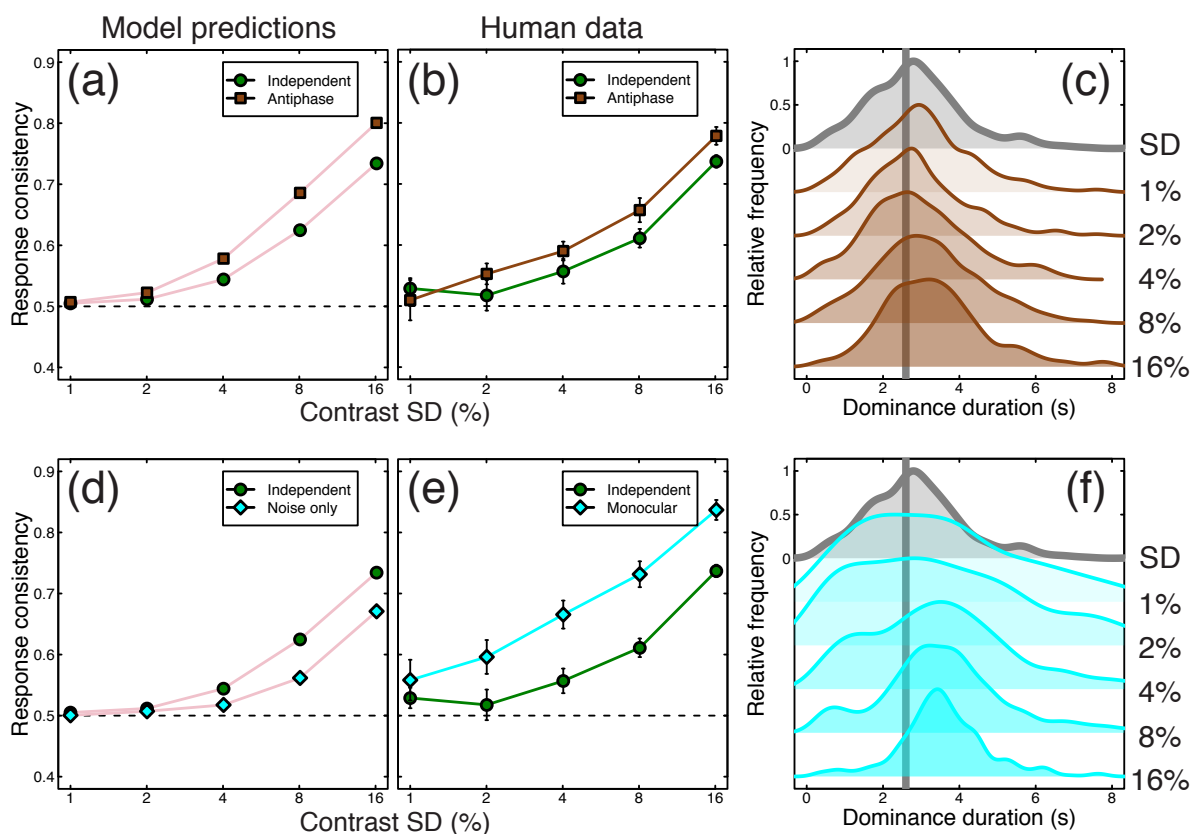

318

319 Figure 7: Summary of further conditions testing antiphase modulation and monocular rivalry. Panel (a) shows  
 320 response consistency predictions of the model for independent (green circles) and antiphase (brown squares)  
 321 external noise (modulation temporal frequency = 1/8hz). Panel (b) shows the human response consistency for  
 322 the same conditions as (a). Panel (c) shows histograms of human dominance durations in the same format as  
 323 Figure 3a, with the unmodulated rivalry condition shown at the top in grey. Panel (d) shows the response  
 324 consistency of the model when the oscillatory mechanism is removed and modulations are driven by internal  
 325 and external noise only (cyan diamonds) versus the response consistency for the main model (green circles).  
 326 Panel (e) shows human response consistency to the 'monocular rivalry' condition (cyan diamonds) compared  
 327 with that of the main experiment (green circles). Panel (f) shows human dominance duration histograms for the  
 328 'monocular rivalry' condition. Error bars and dotted lines show  $\pm 1SE$  across participants (N=4; for the conditions  
 329 from the main experiment, we omitted results from the participant who did not complete the additional  
 330 conditions when constructing this figure).

331

332 We also tested a condition in which we presented both stimuli to both eyes as a plaid, and  
333 modulated the contrast of the components. Just as in the main experiment, we asked  
334 participants to report which component appeared higher in contrast at each moment in time,  
335 though there was no binocular rivalry. This ‘monocular rivalry’ condition also produced  
336 greater consistency scores than the equivalent condition from the main experiment (see  
337 Figure 7e), and demonstrates that the technique can be used to dynamically monitor  
338 perception even in the absence of interocular competition. The distributions of dominance  
339 durations were rather broader for low contrast modulations, but narrowed at higher  
340 contrasts (see Figure 7f).

341

342 We reasoned that one way to model this condition might be to remove the rivalry mechanism  
343 from the model, leaving only the combination of internal and external noise to determine  
344 dominance at each moment. The predictions for this arrangement are shown by the cyan  
345 symbols in Figure 7d, and involve markedly *lower* consistency scores than both the model and  
346 empirical binocular rivalry conditions (green circles in Figures 7d,e), and also the monocular  
347 rivalry data itself (cyan diamonds in Figure 7e). Clearly then, monocular rivalry still involves  
348 some sort of alternation process (e.g. O’Shea et al. (2017), but see Georgeson (1984) for  
349 evidence to the contrary), but the increased empirical consistency scores in this condition  
350 suggest that the alternating mechanism is more strongly driven by the external noise  
351 modulations than during binocular rivalry.

352

## 353 Discussion

354

355 Using a combination of psychophysical experiments and computational modelling, we infer  
356 that the source of internal noise relevant to perceptual alternations during binocular rivalry  
357 has an amplitude spectrum of  $1/f$ , and a standard deviation of around 16%. Our method  
358 facilitates these inferences because it uses a double pass design, in which an external noise  
359 sequence is repeated twice, under the assumption that internal noise will be different on each  
360 pass. Although the double pass method has been used previously for briefly presented stimuli  
361 (Baker and Meese, 2012; Burgess and Colborne, 1988), this is the first time (to our knowledge)  
362 it has been used in a dynamic paradigm. We now discuss details of the rivalry model,  
363 relevance to other work on noise in binocular vision, and broader implications for our  
364 understanding of internal noise in the brain.

365

### 366 *Model variants and alternative models of rivalry*

367

368 In the course of developing the model, we also considered several variants using same  
369 architecture that were either less successful or less plausible. One variant was a model in  
370 which a single source of internal noise was added to both channels. In this arrangement, the  
371 internal noise was less effective, because it increased or decreased the response in both  
372 channels by the same amount, and so did not materially influence the competition between  
373 channels. Another variant placed the internal noise sources outside of the gain control  
374 equation (i.e. added after eqn 1 rather than appearing on the numerator and denominator).  
375 Although moving internal noise later is consistent with the assumptions of a family of popular  
376 computational models of early binocular vision (Legge, 1984; Meese et al., 2006 see next  
377 section), this was less successful than our main model because internal noise levels sufficient

378 to influence consistency had too large an effect on dominance durations. This rendered the  
379 dynamic properties of the model moot, with rivalry percepts being largely determined by the  
380 internal noise streams.

381

382 We also tested alternative values of the main parameters in the rivalry model. These altered  
383 model behaviour in the unmodulated baseline condition much as described in previous work  
384 (Wilson, 2007), but had relatively minimal effects on dominance durations and consistency  
385 scores with strongly noise-modulated stimuli, where rivalry alternations depend more on the  
386 interplay of internal and external noise than on adaptation and inhibition. We anticipate that  
387 other rivalry models with architectures related to that of Wilson (2007, 2003) could be  
388 modified in a similar way as described here to achieve comparable effects, but have not tested  
389 this assumption.

390

### 391 *Related work on rivalry*

392

393 As mentioned above, Kim et al. (2006) modulated the contrast of rivalling stimuli periodically  
394 in antiphase at a range of temporal frequencies (building on earlier work by O'Shea and  
395 Crassini (1984) in which rivalling stimuli were entirely removed at different frequencies and  
396 phases). They implement three computational models to account for their results, each of  
397 which has random walk (i.e. brown) noise with a spectral slope of  $1/f^2$ , but report obtaining  
398 similar results with white noise for their experimental conditions. Furthermore, one of the  
399 models they implement is a version of the Wilson (2003) model considered here, but they  
400 report the best performance when the internal noise is added to the adaptation differential  
401 equation (see Methods), rather than the rivalling units (see also van Ee, 2009). In our  
402 simulations, we found similar effects on the dominance duration distributions for internal  
403 noise placed either in the main equation or adaptation equation (not shown here). However,  
404 placing internal noise in the adaptation differential equation resulted in response consistency  
405 that was not tuned to modulation frequency (i.e., flat). We suspect that Kim et al.'s paradigm  
406 did not afford sufficient constraints to distinguish between the two very different internal  
407 noise types or the locus of internal noise.

408

409 Other models that have incorporated a stochastic component include the model of Lehky  
410 (1988) which also used random walk (brown) noise, Kalarickal and Marshall (2000) who used  
411 additive uniformly distributed (effectively white) noise, and Stollenwerk and Bode (2003) who  
412 used temporally white noise that was correlated across space. A further model developed by  
413 Rubin and colleagues (Moreno-Bote et al., 2007; Shpiro et al., 2009) uses exponentially  
414 filtered white noise which progressively attenuates higher frequencies. However none of  
415 these studies report testing other types of internal noise, nor were their experimental  
416 conditions sufficient to offer meaningful constraints on the internal noise properties. As far  
417 as we are aware, this is the first study that has modelled internal noise of different amplitudes  
418 and spectral properties and compared the predictions to empirical results.

419

420 Baker & Graf (2009a) explored binocular rivalry using broadband pink noise stimuli that also  
421 varied dynamically in time. By testing factorial combinations of temporal amplitude spectra  
422 across the two eyes, they showed that stimuli with  $1/f$  temporal amplitude spectra tended to  
423 dominate over stimuli with different spectral slopes (the same was also true of static stimuli  
424 with a  $1/f$  spatial amplitude spectrum). Whilst these results do not directly imply anything

425 about the properties of internal noise, they are consistent with the idea that the visual system  
426 is optimised for stimuli encountered in the natural world, which are typically  $1/f$  in both space  
427 and time (e.g. Dong and Atick, 1995; Field, 1987; Geisler, 2008; Hansen and Essock, 2005;  
428 Simoncelli and Olshausen, 2001). Our findings here imply that as well as having a preference  
429 for external stimuli with naturalistic properties, the internal structure of the visual system  
430 might itself have evolved to emulate these temporal constraints (Field, 1987; Haun and Peli,  
431 2013; Schwartz and Simoncelli, 2001; Schweinhart et al., 2017).

432

#### 433 *Internal noise in binocular vision and throughout the brain*

434

435 Early models of binocular signal combination attributed the  $\sqrt{2}$  improvement in contrast  
436 sensitivity for fusible stimuli viewed binocularly vs monocularly to the pooling of independent  
437 monocular noise sources (Campbell and Green, 1965). However this model assumes that  
438 during monocular presentation, the noise in the unstimulated eye can be ignored, which is  
439 unlikely in the absence of experimental confounds (Legge, 1984). Contemporary binocular  
440 models of contrast detection and discrimination assume noise that is late and additive,  
441 occurring at a point beyond binocular signal combination (Meese et al., 2006). It is generally  
442 assumed that this late source of noise is the combination of multiple noise generators at  
443 successive stages of processing, though relatively little is known about their precise  
444 characteristics. However a small number of studies have investigated this issue, as we now  
445 summarise.

446

447 Pardhan & Rose (1999) added binocular external noise during a monocular or binocular  
448 detection task and found that binocular summation decreased at high levels of external noise,  
449 and that equivalent input noise (the minimum external noise level required to influence  
450 thresholds) was higher for monocular than binocular targets. One interpretation of these  
451 results is that the effective internal noise is greater for monocularly presented stimuli (see  
452 also Anderson and Movshon, 1989). However, the type of external noise that they used was  
453 broadband white pixel noise, which can also cause substantial gain control suppression (see  
454 Baker and Meese, 2012), potentially confounding the effects of increased variance. These  
455 results are therefore relatively inconclusive regarding sources of internal noise in binocular  
456 vision.

457

458 Recently, Ding & Levi (2016) have demonstrated that the inclusion of early (monocular)  
459 multiplicative noise in gain control models can account for some subtle features of binocular  
460 contrast discrimination performance. It has also been suggested that monocular noise might  
461 be increased in the affected eye of individuals with amblyopia (Baker et al., 2008). Finally, we  
462 have recently shown (Vilidaite et al., 2018) using a contrast discrimination paradigm that EEG  
463 and MEG data are consistent with both an early ( $\sim 100$ ms post stimulus onset) noise source in  
464 low level visual areas, and a later noise source in more frontal and parietal brain areas, both  
465 of which affect perceptual decisions. All of these results are therefore consistent with an early  
466 monocular source of internal noise, as included in our model, but do not preclude the addition  
467 of later sources of noise which we do not consider here.

468

469 Regarding noise more generally, surprisingly few studies have addressed the spectral and  
470 distribution properties of internal noise using psychophysical methods. The default  
471 assumption is typically that internal noise is Gaussian (owing to Central Limit Theorem) and

472 white. However, Neri (2013) concluded that internal noise had a Laplacian distribution, and  
473 other psychophysical work has assumed Poisson processes for internal noise (May and  
474 Solomon, 2015), based on single cell recordings (Goris et al., 2014). Noise with a pink  
475 amplitude spectrum typically retains a Gaussian distribution, though in principle non-  
476 Gaussian distributions (such as Laplacian or Poisson distributions) could also be altered to  
477 have a pink spectrum. Although we are unaware of any other psychophysical studies  
478 attempting to estimate the spectral characteristics of internal noise, we note that  
479 measurements of spontaneous neural activity using ECoG and fMRI also have fractal  
480 properties, and a slope of approximately  $1/f$  in visual areas (He et al., 2010).

481

## 482 *Conclusions*

483

484 Using a novel dynamic double pass paradigm with binocular rivalry, we measured how  
485 alternation rates and response consistency were affected by different types and amounts of  
486 external noise. The results were consistent with a computational model of rivalry in which  
487 internal noise was independent in each monocular channel. We conclude that internal noise  
488 relevant to rivalry has an amplitude spectrum of  $1/f$ , and a standard deviation of around 16%.  
489 We anticipate that future studies might use temporally sensitive neuroimaging techniques  
490 such as EEG and MEG to further investigate these sources of internal noise.

491

## 492 **Methods**

493

### 494 *Participants*

495

496 The main experiment was completed by five psychophysically experienced observers (2  
497 male), who provided written informed consent. Two were the authors, the remainder were  
498 unaware of the aims or design of the study. A control experiment was completed by four of  
499 the same observers. All observers had no known abnormalities of binocular vision, and wore  
500 their standard optical correction if required. Procedures were approved by the Ethics  
501 Committee of the Department of Psychology at the University of York.

502

### 503 *Apparatus and stimuli*

504

505 Stimuli were sinusoidal grating patches with a spatial frequency of 1c/deg, subtending two  
506 degrees of visual angle, and ramped in contrast by a cosine function over a further  $\frac{1}{4}$  degree.  
507 The gratings shown to the left and right eyes had orthogonal orientations ( $\pm 45$  degrees) which  
508 were assigned randomly on each trial (see Figure 1a for examples). The mean Michelson  
509 contrast of the gratings was 50%, but this was modulated by dynamic noise streams of various  
510 centre frequencies (1/16 Hz to 1Hz) and standard deviations (1% to 16% Michelson contrast).  
511 The noise streams were constructed by bandpass filtering white noise at the required  
512 frequency using a one octave bandpass filter (see Figure 1b). In the main experiment, the  
513 noise streams used to modulate the contrast of each eye were independent.

514

515 Stimuli were displayed on a ViewPixx 3D display (VPixx Ltd., Canada), driven by an Apple  
516 Macintosh computer. The monitor operated with 16 bits of greyscale luminance resolution  
517 (M16 mode) and was gamma corrected using a Minolta LS110 photometer. Independent  
518 stimulation of the left and right eyes was achieved using stereo shutter glasses (NVidia 3D

519 Vision), synchronised with the monitor refresh rate of 120Hz via an infra-red signal. To  
520 promote good vergence and binocular alignment, each stimulus was surrounded by a static  
521 high contrast greyscale Voronoi texture (squares of 14 x 14 degrees, with a 7 degree diameter  
522 disc in the centre set to mean luminance) that was identical in both eyes (see Figure 1a). A  
523 different texture was presented on each trial, selected at random from a set of 99 pre-  
524 generated textures.

#### 525 526 *Procedure*

527  
528 Participants sat in a darkened room and viewed the display from a distance of 57cm. Stimuli  
529 were presented for 60 seconds per trial, with condition order determined at random.  
530 Participants were instructed to indicate using a two-button mouse which of the two grating  
531 stimuli they perceived at each moment in time by holding down one or other button. If both  
532 stimuli were perceived, they were instructed to choose the stimulus that was most visible (i.e.  
533 that took up the largest part of the image), or to hold down both buttons if they were equally  
534 salient. At the end of each trial, there was a minimum blank interval of three seconds, with  
535 the following trial initiated by the participant.

536  
537 Each of the 26 conditions (5 contrasts \* 5 temporal frequencies + 1 baseline) was repeated 5  
538 times by each observer using unique noise sequences in each repetition, and then a further 5  
539 times using the same noise sequences as in the first pass. This resulted in 260 trials (4.3 hours  
540 of rivalry data) per participant, which were completed across multiple sessions (each typically  
541 lasting 20-30 minutes) over several days. Raw data are available online at: [http://dx.doi.org/](http://dx.doi.org/10.6084/m9.figshare.7262201)  
542 [10.6084/m9.figshare.7262201](http://dx.doi.org/10.6084/m9.figshare.7262201)

#### 543 544 *Modelling*

545  
546 There are multiple models that have been successful at capturing the oscillatory behaviour of  
547 dominant percepts in binocular rivalry (Kim et al., 2006; Laing and Chow, 2002; Lehky, 1988;  
548 Wilson, 2007, 2003). While they vary in complexity, all include two key characteristics:  
549 inhibition between units responding to the left and right monocular stimuli, and self-  
550 adaptation. These guarantee that only one unit will be active at a given moment, and that  
551 over time, the active unit will decrease its firing rate sufficiently to allow the suppressed unit  
552 to be released from inhibition. Apart from a few exceptions (Brascamp et al., 2006; Kalarickal  
553 and Marshall, 2000; Kim et al., 2006; Lehky, 1988; Moreno-Bote et al., 2007; Shpiro et al.,  
554 2009; Stollenwerk and Bode, 2003), most computational investigations of binocular rivalry  
555 have focused on deterministic implementations of their models to investigate how  
556 suppression and self-adaptation contribute to oscillations in perceptual dominance. It is,  
557 however, fairly straightforward to adapt these models of rivalry to include an additive noise  
558 term and directly probe the properties (i.e., amplitude and spectral qualities) of internal  
559 noise. Here, we probe the properties of internal noise with the minimum rivalry model of  
560 Wilson (2007, 2003).

561  
562 The minimum rivalry model defines the response of a single unit by two differential equations  
563 (equation 1 and equation 2), which incorporate stimulus excitation ( $L/R$ ), self-excitation ( $\varepsilon =$   
564  $0.2$ ), competitive inhibition ( $\omega = 3.5$ ), self-adaptation ( $H$ ), and here, an additive internal noise

565 term (N). For the unit responding to stimuli presented to the left eye ( $E_L$ ), the response term  
566 is  
567

$$\tau \frac{dE_L}{dt} = -E_L + \frac{M[L - \omega E_R + \epsilon E_L + gH_L + N_L]_+}{1 + [L - \omega E_R + \epsilon E_L + gH_L + N_L]_+^{0.8}} \quad (1)$$

568 and self-adaptation is  
569  
570

$$\tau_h \frac{dH_L}{dt} = -H_L + E_L \quad (2)$$

571 which is identical for activity in the right eye ( $E_R$ ), but with the subscripts switched. The  
572 constants  $M$  and  $g$  serve to scale the response gain and adaptation strength and were set to  
573 values of 1.0 and 3.0, respectively. The excitatory ( $\tau$ ) and hyperpolarizing ( $\tau_h$ ) time constants  
574 of equation 1 and equation 2 were set to 15ms and 4000ms respectively. All model  
575 parameters were fixed in our simulations. Internal noise was additive and independently  
576 generated for each eye. As previous studies have already investigated the locus of internal  
577 noise with this particular model (Kim et al., 2006), we chose here to only conduct model  
578 simulations with noise added to the unit response equation (equation 1). Note that as the  
579 stimulus input to the model is identical to that of the psychophysical experiment (see Figure  
580 2a), we use a contrast gain control variant of the Minimum rivalry model (Wilson, 2007) to  
581 account for any differences in contrast between eyes. This also means that the noise term is  
582 added to both the numerator and denominator of equation 1.  
583

584 We probed the spectral characteristics of internal noise by injecting the model with  
585 broadband noise patterns ( $1/f^\alpha$ ) generated at one of five different spectral slopes\*, where  $\alpha =$   
586  $[0, 0.5, 1.0, 1.5, 2.0]$  (see Figure 2b). Noise patterns were generated in the Fourier domain by  
587 first creating a flat ( $\alpha = 0$ ) amplitude spectrum and then multiplying the amplitude coefficient  
588 at each frequency by  $f^\alpha$ . The phase of each frequency component was assigned a random  
589 value between  $-\pi$  and  $\pi$ . Two different phase spectra were generated in order to create two  
590 independent noise streams ( $N_L$  and  $N_R$ ) with the same amplitude spectrum. These were  
591 rendered in the temporal domain by taking the inverse Fourier transform and adding them to  
592 the left and right units separately.  
593

594 Perceptual switches were implemented as a winner-take-all rule: the dominance of a percept  
595 was defined by the magnitude of  $E_{L/R}$  at any given moment in time (if  $E_L > E_R$ ,  $E_L$  is dominant;  
596 see Figure 2c) Finally, all model simulations were conducted in MATLAB (version R2017a)  
597 using ODE45 to solve the 4 differential equations that define the response of each unit and  
598 their self-adaptation over 60 seconds (i.e. the duration of a trial in the psychophysical  
599 experiment). We simulated binocular rivalry twice – with different internal noise samples but  
600

---

\* We also conducted simulations with bandpass filtered internal noise streams with the same frequencies as that of the stimulus sequences, in addition to the broadband internal noise simulations. Response consistency was high for all stimulus conditions, which suggests that this type of internal noise is incapable of modulating model responses beyond that of the external noise sequences. As these results do not offer any additional insight to the characteristics of internal noise, we do not show them here.



601 the same external noise sequences – for each stimulus noise condition in order to calculate  
602 the response consistency of the model. This was repeated 1000 times, and the model outputs  
603 (dominance duration and response consistency) were averaged across repetitions.

604

## 605 **Acknowledgements**

606

607 Supported in part by the Wellcome Trust (ref: 105624) through the Centre for Chronic  
608 Diseases and Disorders at the University of York. We thank Robert O’Shea and two  
609 anonymous reviewers for helpful comments on a previous version of the manuscript.

610

## 611 **References**

612

- 613 Alais D, Cass J, O’Shea RP, Blake R. 2010. Visual sensitivity underlying changes in visual  
614 consciousness. *Curr Biol CB* **20**:1362–1367. doi:10.1016/j.cub.2010.06.015
- 615 Anderson PA, Movshon JA. 1989. Binocular combination of contrast signals. *Vision Res*  
616 **29**:1115–1132.
- 617 Baker DH, Graf EW. 2009a. Natural images dominate in binocular rivalry. *Proc Natl Acad*  
618 *Sci U S A* **106**:5436–5441. doi:10.1073/pnas.0812860106
- 619 Baker DH, Graf EW. 2009b. On the relation between dichoptic masking and binocular  
620 rivalry. *Vision Res* **49**:451–459. doi:10.1016/j.visres.2008.12.002
- 621 Baker DH, Meese TS. 2012. Zero-dimensional noise: the best mask you never saw. *J Vis*  
622 **12**:20. doi:10.1167/12.10.20
- 623 Baker DH, Meese TS. 2007. Binocular contrast interactions: dichoptic masking is not a single  
624 process. *Vision Res* **47**:3096–3107. doi:10.1016/j.visres.2007.08.013
- 625 Baker DH, Meese TS, Hess RF. 2008. Contrast masking in strabismic amblyopia:  
626 attenuation, noise, interocular suppression and binocular summation. *Vision Res*  
627 **48**:1625–1640. doi:10.1016/j.visres.2008.04.017
- 628 Brascamp JW, van Ee R, Noest AJ, Jacobs RHAH, van den Berg AV. 2006. The time course  
629 of binocular rivalry reveals a fundamental role of noise. *J Vis* **6**:1244–1256.  
630 doi:10.1167/6.11.8
- 631 Buckthought A, Kim J, Wilson HR. 2008. Hysteresis effects in stereopsis and binocular  
632 rivalry. *Vision Res* **48**:819–830. doi:10.1016/j.visres.2007.12.013
- 633 Burgess AE, Colborne B. 1988. Visual signal detection. IV. Observer inconsistency. *J Opt*  
634 *Soc Am A* **5**:617–627.
- 635 Campbell FW, Green DG. 1965. Monocular versus binocular visual acuity. *Nature* **208**:191–  
636 192.
- 637 Ding J, Levi DM. 2016. Binocular contrast discrimination needs monocular multiplicative  
638 noise. *J Vis* **16**:12. doi:10.1167/16.5.12
- 639 Dong DW, Atick JJ. 1995. Statistics of natural time-varying images. *Netw Comput Neural*  
640 *Syst* **6**:345–358. doi:10.1088/0954-898X\_6\_3\_003
- 641 Field DJ. 1987. Relations between the statistics of natural images and the response properties  
642 of cortical cells. *J Opt Soc Am A* **4**:2379–2394.
- 643 Geisler WS. 2008. Visual perception and the statistical properties of natural scenes. *Annu Rev*  
644 *Psychol* **59**:167–192. doi:10.1146/annurev.psych.58.110405.085632
- 645 Georgeson MA. 1984. Eye movements, afterimages and monocular rivalry. *Vision Res*  
646 **24**:1311–1319.
- 647 Goris RLT, Movshon JA, Simoncelli EP. 2014. Partitioning neuronal variability. *Nat*  
648 *Neurosci* **17**:858–865. doi:10.1038/nn.3711
- 649 Green DM. 1964. Consistency of auditory detection judgements. *Psychol Rev* **71**:392–407.

- 650 Hansen B, Essock E. 2005. Influence of scale and orientation on the visual perception of  
651 natural scenes. *Vis Cogn* **12**:1199–1234. doi:10.1080/13506280444000715
- 652 Haun AM, Peli E. 2013. Perceived contrast in complex images. *J Vis* **13**:3.  
653 doi:10.1167/13.13.3
- 654 He BJ, Zempel JM, Snyder AZ, Raichle ME. 2010. The Temporal Structures and Functional  
655 Significance of Scale-free Brain Activity. *Neuron* **66**:353–369.  
656 doi:10.1016/j.neuron.2010.04.020
- 657 Kalarickal GJ, Marshall JA. 2000. Neural model of temporal and stochastic properties of  
658 binocular rivalry. *Neurocomputing* **32–33**:843–853. doi:10.1016/S0925-  
659 2312(00)00252-6
- 660 Kim Y-J, Grabowecky M, Suzuki S. 2006. Stochastic resonance in binocular rivalry. *Vision*  
661 *Res* **46**:392–406. doi:10.1016/j.visres.2005.08.009
- 662 Laing CR, Chow CC. 2002. A spiking neuron model for binocular rivalry. *J Comput*  
663 *Neurosci* **12**:39–53.
- 664 Lankheet MJM. 2006. Unraveling adaptation and mutual inhibition in perceptual rivalry. *J*  
665 *Vis* **6**:1. doi:10.1167/6.4.1
- 666 Legge GE. 1984. Binocular contrast summation--II. Quadratic summation. *Vision Res*  
667 **24**:385–394.
- 668 Legge GE. 1979. Spatial frequency masking in human vision: binocular interactions. *J Opt*  
669 *Soc Am* **69**:838–847.
- 670 Lehky SR. 1995. Binocular rivalry is not chaotic. *Proc Biol Sci* **259**:71–76.  
671 doi:10.1098/rspb.1995.0011
- 672 Lehky SR. 1988. An astable multivibrator model of binocular rivalry. *Perception* **17**:215–  
673 228. doi:10.1068/p170215
- 674 Leopold DA, Wilke M, Maier A, Logothetis NK. 2002. Stable perception of visually  
675 ambiguous patterns. *Nat Neurosci* **5**:605–609. doi:10.1038/nn851
- 676 May KA, Solomon JA. 2015. Connecting psychophysical performance to neuronal response  
677 properties I: Discrimination of suprathreshold stimuli. *J Vis* **15**:8. doi:10.1167/15.6.8
- 678 Meese TS, Baker DH. 2009. Cross-orientation masking is speed invariant between ocular  
679 pathways but speed dependent within them. *J Vis* **9**:2. doi:10.1167/9.5.2
- 680 Meese TS, Georgeson MA, Baker DH. 2006. Binocular contrast vision at and above  
681 threshold. *J Vis* **6**:1224–1243. doi:10.1167/6.11.7
- 682 Moreno-Bote R, Rinzel J, Rubin N. 2007. Noise-Induced Alternations in an Attractor  
683 Network Model of Perceptual Bistability. *J Neurophysiol* **98**:1125–1139.  
684 doi:10.1152/jn.00116.2007
- 685 Neri P. 2013. The statistical distribution of noisy transmission in human sensors. *J Neural*  
686 *Eng* **10**:016014. doi:10.1088/1741-2560/10/1/016014
- 687 O'Shea RP, Crassini B. 1984. Binocular rivalry occurs without simultaneous presentation of  
688 rival stimuli. *Percept Psychophys* **36**:266–276.
- 689 O'Shea RP, Roeber U, Wade NJ. 2017. On the Discovery of Monocular Rivalry by  
690 Tscherning in 1898: Translation and Review. *iPerception* **8**:204166951774352.  
691 doi:10.1177/2041669517743523
- 692 Pardhan S, Rose D. 1999. Binocular and monocular detection of Gabor patches in binocular  
693 two-dimensional noise. *Perception* **28**:203–215. doi:10.1068/p2739
- 694 Schwartz O, Simoncelli EP. 2001. Natural signal statistics and sensory gain control. *Nat*  
695 *Neurosci* **4**:819–825. doi:10.1038/90526
- 696 Schweinhart AM, Shafiq P, Essock EA. 2017. Distribution of content in recently-viewed  
697 scenes whitens perception. *J Vis* **17**:8. doi:10.1167/17.3.8

- 698 Shpiro A, Moreno-Bote R, Rubin N, Rinzel J. 2009. Balance between noise and adaptation in  
699 competition models of perceptual bistability. *J Comput Neurosci* **27**:37–54.  
700 doi:10.1007/s10827-008-0125-3
- 701 Simoncelli EP, Olshausen BA. 2001. Natural image statistics and neural representation. *Annu*  
702 *Rev Neurosci* **24**:1193–1216. doi:10.1146/annurev.neuro.24.1.1193
- 703 Stollenwerk L, Bode M. 2003. Lateral neural model of binocular rivalry. *Neural Comput*  
704 **15**:2863–2882. doi:10.1162/089976603322518777
- 705 Stuit SM, Cass J, Paffen CLE, Alais D. 2009. Orientation-tuned suppression in binocular  
706 rivalry reveals general and specific components of rivalry suppression. *J Vis* **9**:17.  
707 doi:10.1167/9.11.17
- 708 Stuit SM, Paffen CLE, van der Smagt MJ, Verstraten FAJ. 2011. Suppressed images  
709 selectively affect the dominant percept during binocular rivalry. *J Vis* **11**:7.  
710 doi:10.1167/11.10.7
- 711 van Ee R. 2009. Stochastic variations in sensory awareness are driven by noisy neuronal  
712 adaptation: evidence from serial correlations in perceptual bistability. *J Opt Soc Am A*  
713 *Opt Image Sci Vis* **26**:2612–2622. doi:10.1364/JOSAA.26.002612
- 714 Vildaite G, Marsh E, Baker DH. 2018. Internal noise in contrast discrimination propagates  
715 forwards from early visual cortex. doi:10.1101/364612
- 716 Wilson HR. 2007. Minimal physiological conditions for binocular rivalry and rivalry  
717 memory. *Vision Res* **47**:2741–2750. doi:10.1016/j.visres.2007.07.007
- 718 Wilson HR. 2003. Computational evidence for a rivalry hierarchy in vision. *Proc Natl Acad*  
719 *Sci U S A* **100**:14499–14503. doi:10.1073/pnas.2333622100
- 720
- 721
- 722

723 Supplementary information

724

725

726

727

728

729

P1

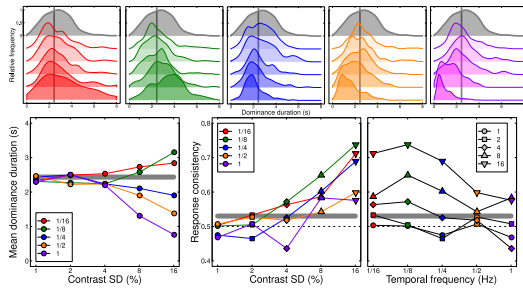

P2

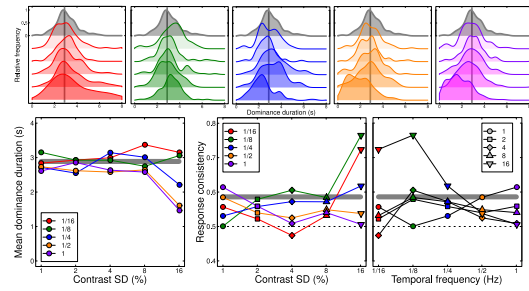

P3

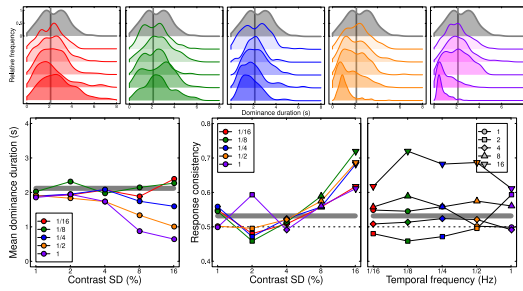

P4

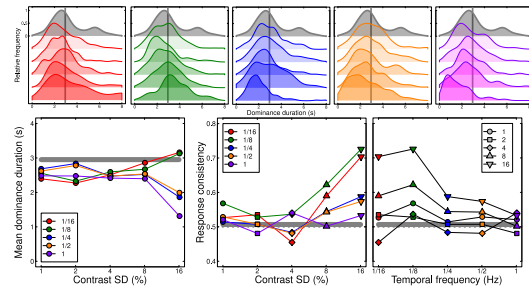

P5

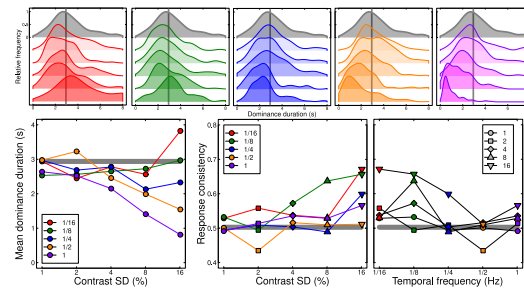

730

731

732 Figure S1: Data for individual participants (P1-5). See the captions to Figures 3 and 4 for formatting details

733

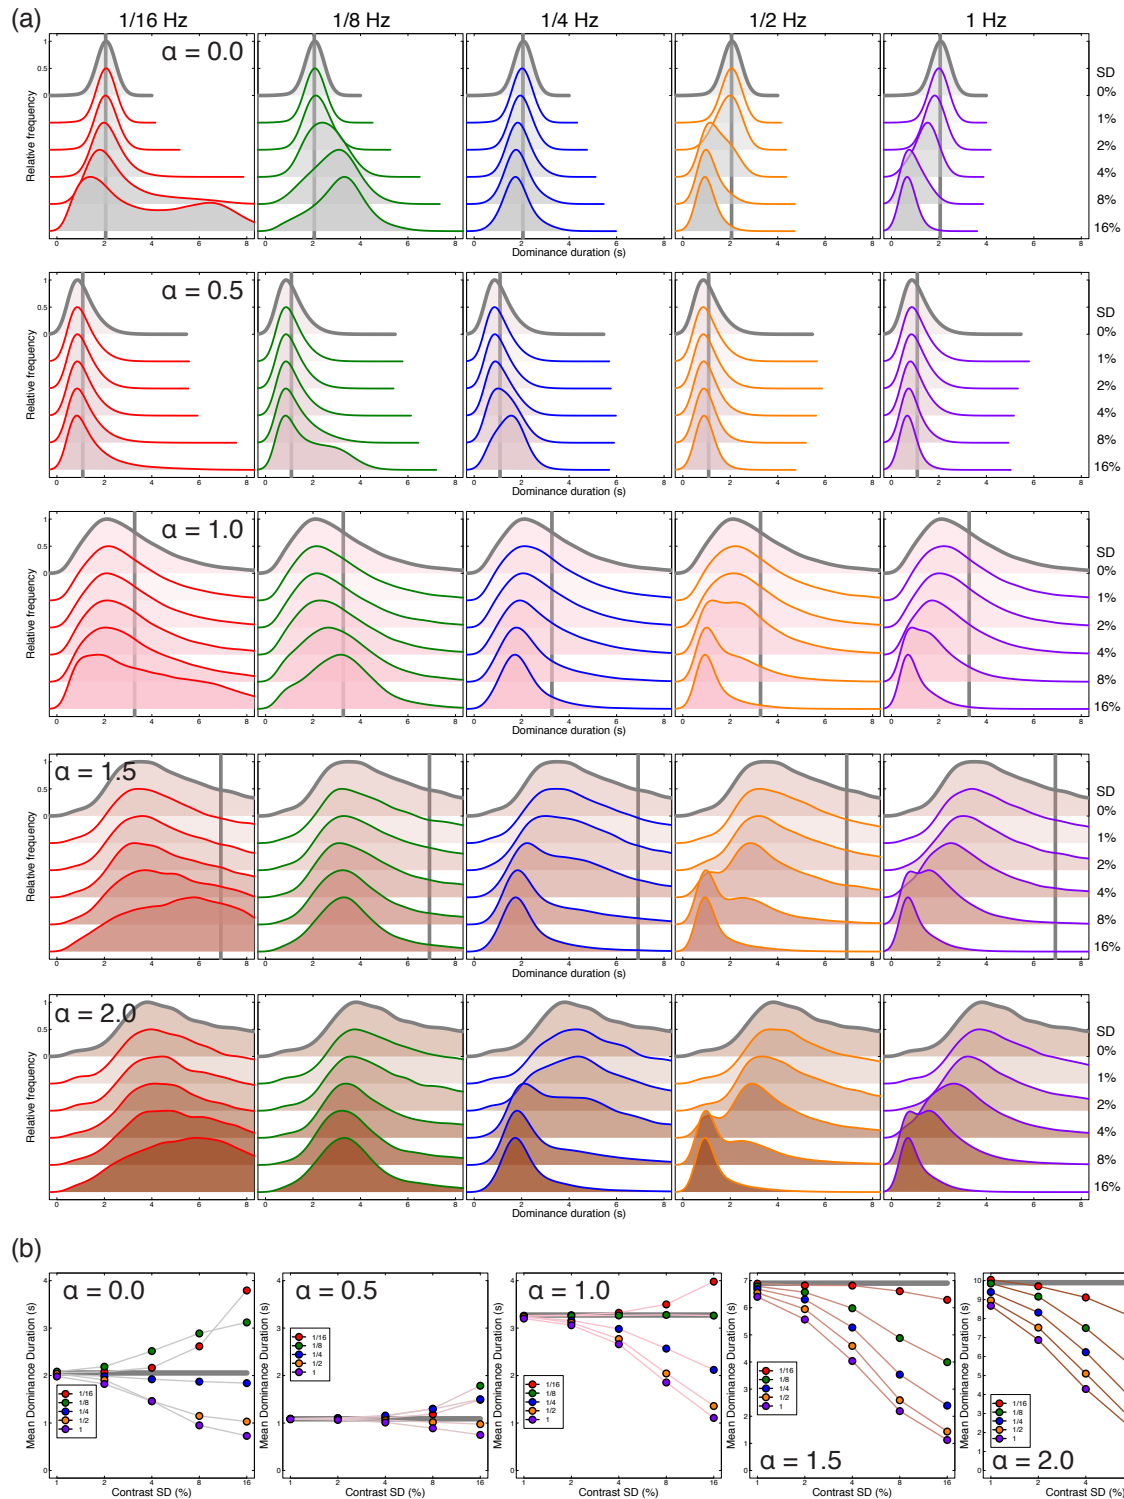

734  
735  
736  
737  
738  
739

Figure S2. (a) Model dominance duration histograms for each of the five noise  $\alpha$ s and stimulus condition as in Figure 6a. The solid line colour indicates the stimulus temporal frequency while the fill colour marks the noise  $\alpha$ . The grey vertical line marks the mean dominance duration of the 0% modulation contrast condition. For very steep slopes ( $\alpha = 2$ ) the mean exceeds the x axis limit ( $\sim 10$ s). (b) The average dominance duration for each model noise  $\alpha$  as in Figure 6b. Note the different scale for the y axis with internal noise  $\alpha$ s of 1.5 and 2.0.

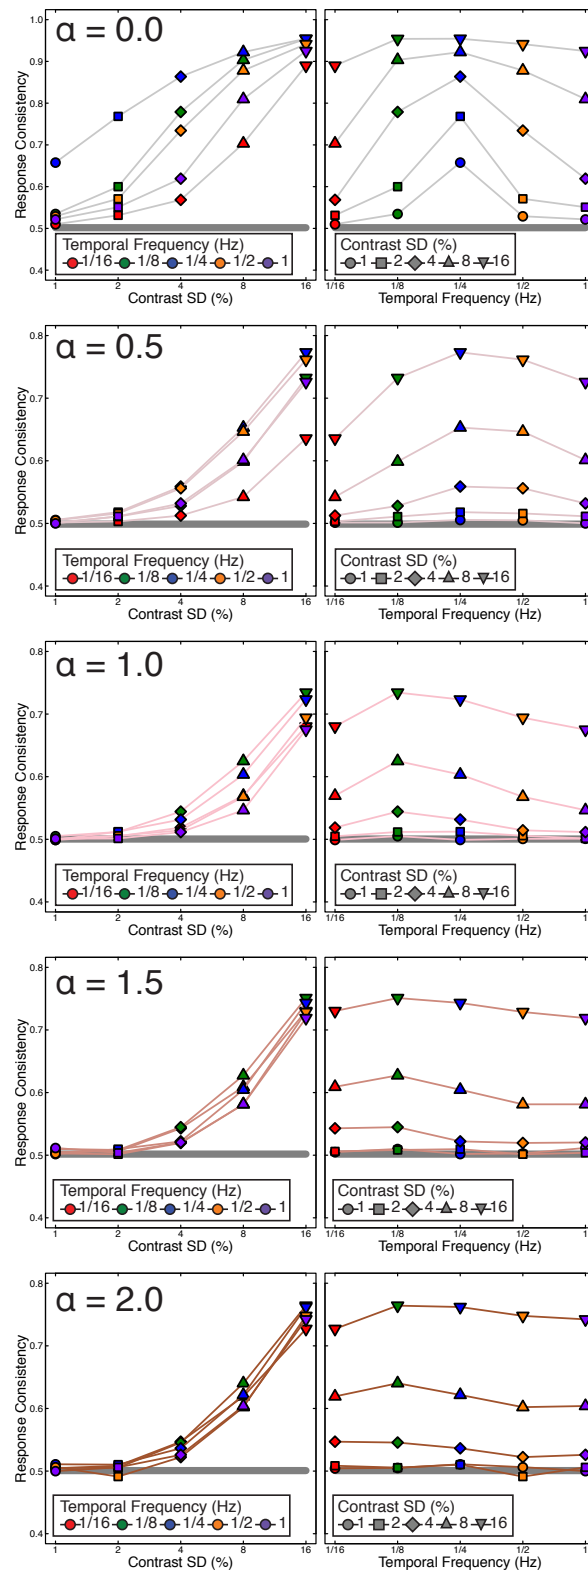

740

741 Figure S3. Response consistency for all five internal noise  $\alpha$  values investigated here. The left column charts  
 742 response consistency for each modulation contrast while the right column shows the same data replotted  
 743 according to modulation frequency as in Figure 6c and 6d.
